# Supplementary material for: A Validation Study on the Frequency and Natural History of Miscarriages Using the Spanish Primary Care Database BIFAP
Source: Healthcare (Basel). 2021 May 18;9(5):596. doi: 10.3390/healthcare9050596 (PMC8157258; doi:10.3390/healthcare9050596)
Supplement: Supplementary file 1 [file healthcare-09-00596-s001.zip › healthcare-1202942-supplementary.pdf]

**Table S1.** Cumulative incidence of miscarriage per 1000 women and incidence rate of miscarriage per 1000 women-weeks according to specific risk profile groups.

| Group                                                           | N° of Cases | Median Weeks among Cases (IQR) | Person Time | Cumulative Incidence per 1000 women | Incidence Rate per 1000 Women-Weeks | Log Rank Test  |
|-----------------------------------------------------------------|-------------|--------------------------------|-------------|-------------------------------------|-------------------------------------|----------------|
| <b>Restricted to sample with LMP date recorded, N = 101,307</b> |             |                                |             |                                     |                                     |                |
| <b>All women, N = 101,307</b>                                   | 7827        | 10 (8–12)                      | 2,078,295   | 18.48 (17.67–19.33)                 | 3.77 (3.68–3.85)                    | N.A.<br><0.001 |
| Age                                                             |             |                                |             |                                     |                                     |                |
| Age <30 years, N = 30782                                        | 1731        | 10 (7–12)                      | 638,691     | 56.23 (53.72–58.86)                 | 2.71 (2.59–2.84)                    |                |
| Age 30–34 years, N = 39,429                                     | 2685        | 10 (7–12)                      | 818,944     | 68.10 (65.65–70.63)                 | 3.28 (3.16–3.41)                    |                |
| Age 35–39 years, N = 25,534                                     | 2462        | 10 (8–12)                      | 516,447     | 96.42 (92.86–100.10)                | 4.78 (4.58–4.96)                    |                |
| Age 40 years and more, N = 5562                                 | 949         | 10 (8–11)                      | 104,213     | 170.62 (160.96–180.73)              | 9.11 (8.54–9.70)                    | 0.0107         |
| Psychiatric antecedents, N = 1141                               | 110         | 10 (7–12)                      | 22,930      | 96.41 (80.61–114.91)                | 4.80 (3.98–5.78)                    |                |
| Non-Psychiatric antecedents, N = 100,166                        | 7717        | 10 (8–12)                      | 2,055,365   | 77.04 (75.41–78.71)                 | 3.75 (3.67–3.84)                    |                |
| Metabolic antecedents, N = 12,649                               | 1092        | 10 (7–11)                      | 257,001     | 86.33 (81.56–91.35)                 | 4.25 (4.00–4.51)                    |                |
| Non-metabolic antecedents, N = 88,658                           | 6735        | 10 (8–12)                      | 1,821,294   | 75.97 (74.24–77.73)                 | 3.70 (3.61–3.79)                    |                |
| At least one drug (exc. Vits/minerals), N = 47,202              | 3900        | 9 (7–12)                       | 962,942     | 82.62 (80.17–85.14)                 | 4.05 (3.93–4.18)                    | <0.001         |
| No drugs (exc. Vits/minerals), N = 54,105                       | 3927        | 10 (8–12)                      | 1,115,353   | 72.58 (70.43–74.80)                 | 3.52 (3.41–3.63)                    |                |
| At least one drug cat D/X, N = 4681                             | 471         | 10 (8–12)                      | 93,947      | 100.62 (92.33–109.57)               | 5.01 (4.58–5.49)                    |                |
| No drugs cat D/X, N = 96,626                                    | 7356        | 10 (8–12)                      | 1,984,347   | 76.13 (74.47–77.82)                 | 3.71 (3.62–3.79)                    |                |

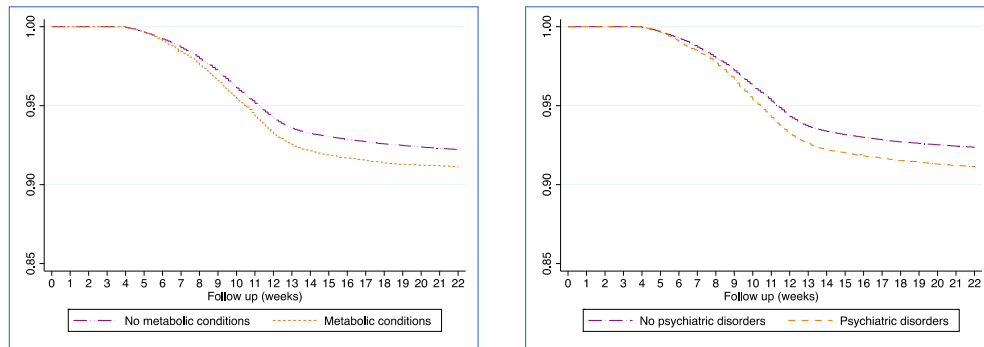

**Figure S1.** Kaplan–Meier survival estimate showing time to miscarriage onset according to metabolic antecedents (left figure) and according to psychiatric disorders (right figure) and restricted to women with LMP date recorded.



**Figure S2.** Kaplan–Meier survival estimate showing time to miscarriage onset according to receiving at least one medication (left figure) and according to receiving at least one medicine classified as D or X according to FDA classification and restricted to women with LMP date recorded.
